# Supplementary material
Source: PubMed Central journal article supplement (PMC7883706)

**Figure S1**

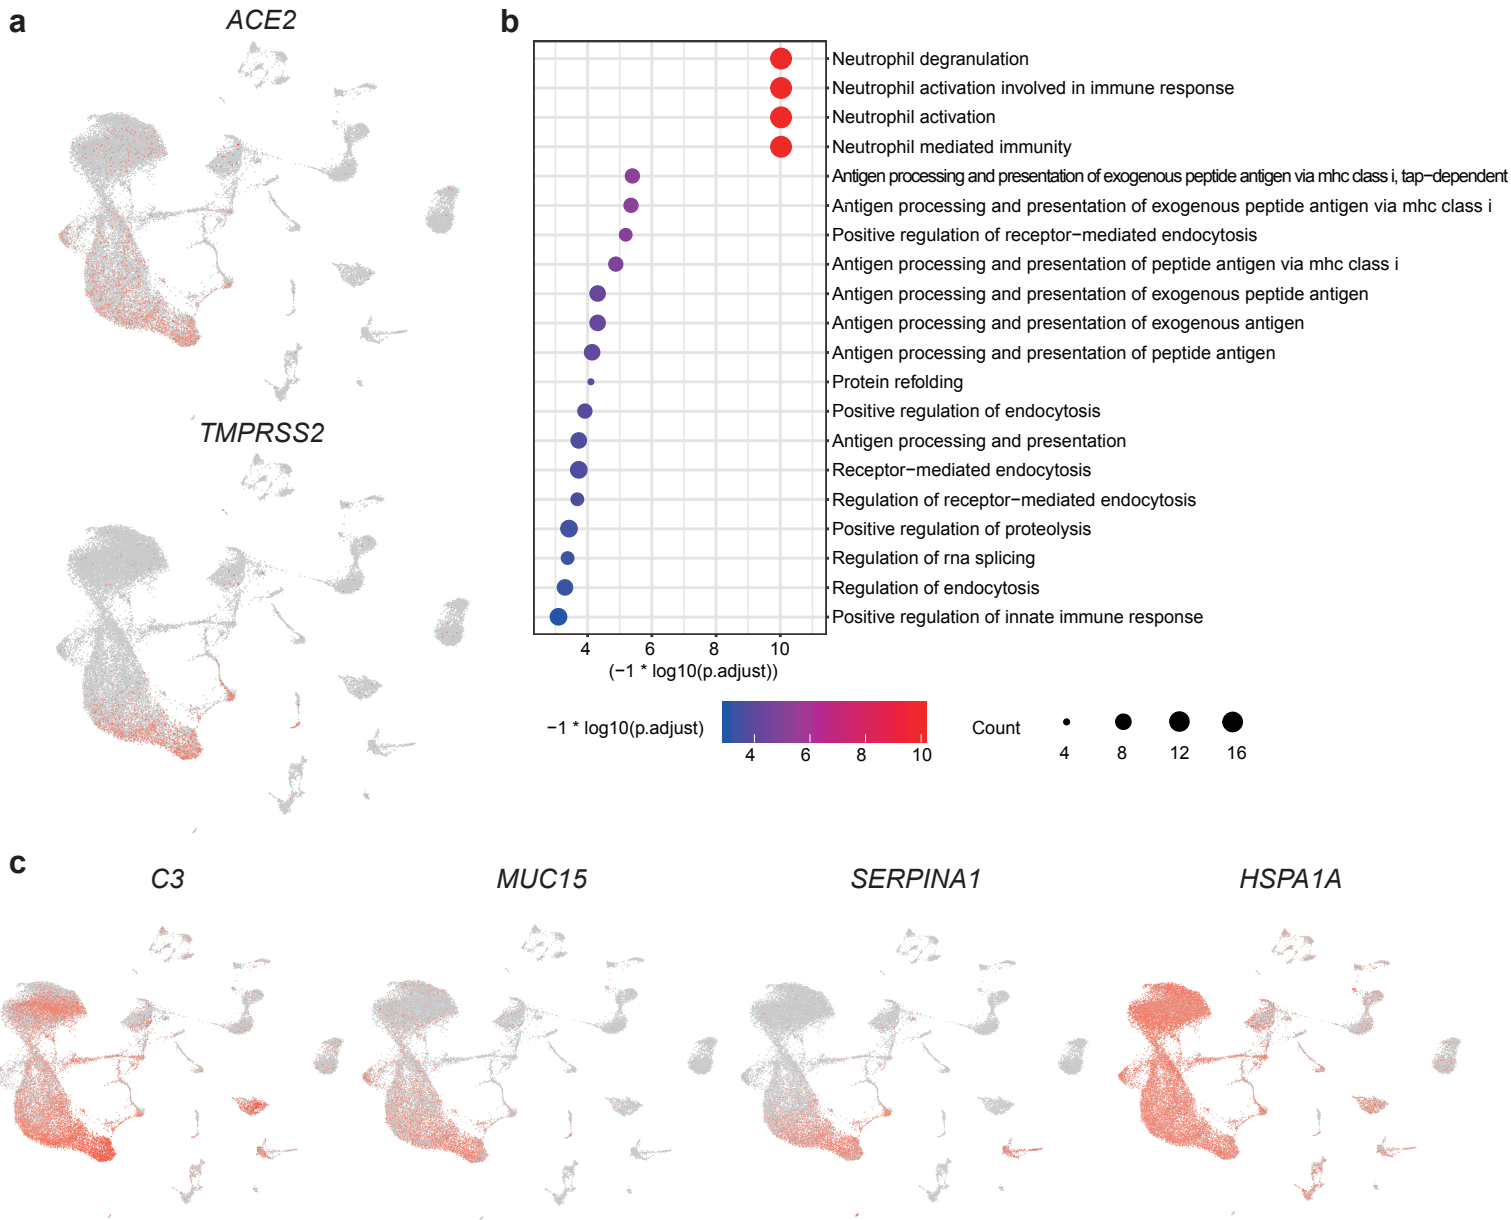

Supplement: mmc1.pdf [file mmc1.pdf]
